# Supplementary material for: Human Adenovirus-Specific γ/δ and CD8+ T Cells Generated by T-Cell Receptor Transfection to Treat Adenovirus Infection after Allogeneic Stem Cell Transplantation
Source: PubMed Central journal article supplement (PMC4188623; doi:10.1371/journal.pone.0109944), 2014-10-07
Supplement: pone.0109944.s001.pdf [file pone.0109944.s001.pdf]

Table S1: raw data to Fig. 1  
Light units

|                                         | Exp. 1   | Exp. 2  | Exp. 3   | Exp. 4   | Exp. 5   |
|-----------------------------------------|----------|---------|----------|----------|----------|
| CD4 Jurkat Adeno TCR w/o peptide        | 697,00   |         | 296,00   | 215,00   | 248,00   |
| CD4 Jurkat Adeno TCR Adeno/A1 peptide   | 2764,00  |         | 702,00   | 902,00   | 603,00   |
| CD4 Jurkat Adeno TCR MAGE3/A1 peptide   | 337,00   |         | 237,00   | 239,00   | 253,00   |
| CD4 Jurkat MAGE-A3 TCR w/o peptide      | 1198,00  |         | 365,00   | 302,00   | 343,00   |
| CD4 Jurkat MAGE-A3 TCR Adeno/A1 peptide |          |         | 351,00   | 350,00   | 344,00   |
| CD4 Jurkat MAGE-A3 TCR MAGE3/A1 peptide | 1280,00  |         | 350,00   | 343,00   | 302,00   |
| CD8 Jurkat Adeno TCR w/o peptide        | 1479,00  | 186,00  | 2090,00  | 1820,00  | 1819,00  |
| CD8 Jurkat Adeno TCR Adeno/A1 peptide   | 19830,00 | 2515,00 | 27128,00 | 24010,00 | 23518,00 |
| CD8 Jurkat Adeno TCR MAGE3/A1 peptide   | 1464,00  | 273,00  | 1666,00  | 1465,00  | 1976,00  |
| CD8 Jurkat MAGE-A3 TCR w/o peptide      | 1944,00  | 515,00  | 2406,00  | 1810,00  | 2731,00  |
| CD8 Jurkat MAGE-A3 TCR Adeno/A1 peptide |          | 266,00  | 2298,00  | 2498,00  | 2203,00  |
| CD8 Jurkat MAGE-A3 TCR MAGE3/A1 peptide | 25692,00 | 2796,00 | 20618,00 | 20907,00 | 18207,00 |

Fold induction

|                                         | Exp. 1 | Exp. 2 | Exp. 3 | Exp. 4 | Exp. 5 |
|-----------------------------------------|--------|--------|--------|--------|--------|
| CD4 Jurkat Adeno TCR w/o peptide        | 1,00   |        | 1,00   | 1,00   | 1,00   |
| CD4 Jurkat Adeno TCR Adeno/A1 peptide   | 3,97   |        | 2,37   | 4,20   | 2,43   |
| CD4 Jurkat Adeno TCR MAGE3/A1 peptide   | 0,48   |        | 0,80   | 1,11   | 1,02   |
| CD4 Jurkat MAGE-A3 TCR w/o peptide      | 1,00   |        | 1,00   | 1,00   | 1,00   |
| CD4 Jurkat MAGE-A3 TCR Adeno/A1 peptide |        |        | 0,96   | 1,16   | 1,00   |
| CD4 Jurkat MAGE-A3 TCR MAGE3/A1 peptide | 1,07   |        | 0,96   | 1,14   | 0,88   |
| CD8 Jurkat Adeno TCR w/o peptide        | 1,00   | 1,00   | 1,00   | 1,00   | 1,00   |
| CD8 Jurkat Adeno TCR Adeno/A1 peptide   | 13,41  | 13,52  | 12,98  | 13,19  | 12,93  |
| CD8 Jurkat Adeno TCR MAGE3/A1 peptide   | 0,99   | 1,47   | 0,80   | 0,80   | 1,09   |
| CD8 Jurkat MAGE-A3 TCR w/o peptide      | 1,00   | 1,00   | 1,00   | 1,00   | 1,00   |
| CD8 Jurkat MAGE-A3 TCR Adeno/A1 peptide |        | 0,52   | 0,96   | 1,38   | 0,81   |
| CD8 Jurkat MAGE-A3 TCR MAGE3/A1 peptide | 13,22  | 5,43   | 8,57   | 11,55  | 6,67   |

Table S2A: raw data to Fig. 2A

| IL-2 (pg/ml)               | Experiment 1 | Experiment 2 | Experiment 3 | Experiment 4 | Experiment 5 |
|----------------------------|--------------|--------------|--------------|--------------|--------------|
| mock w/o peptide           | 9,44         | 0,87         | 0,55         | 1,76         | 0,60         |
| mock Adeno/A1 peptide      | 40,95        | 4,93         | 6,46         | 19,26        | 1,54         |
|                            |              |              |              |              |              |
| Adeno TCR w/o peptide      | 8,79         | 0,77         | 0,33         | 2,01         | 1,24         |
| Adeno TCR Adeno/A1 peptide | 5366,83      | 2695,51      | 512,54       | 2197,97      | 3528,27      |

| TNF (pg/ml)                | Experiment 1 | Experiment 2 | Experiment 3 | Experiment 4 | Experiment 5 |
|----------------------------|--------------|--------------|--------------|--------------|--------------|
| mock w/o peptide           | 11,37        | 5,45         | 10,28        | 4,33         | 15,29        |
| mock Adeno/A1 peptide      | 14,50        | 7,51         | 34,90        | 5,49         | 26,46        |
|                            |              |              |              |              |              |
| Adeno TCR w/o peptide      | 11,23        | 5,85         | 7,96         | 7,55         | 16,40        |
| Adeno TCR Adeno/A1 peptide | 3369,04      | 1870,31      | 629,67       | 258,98       | 1312,59      |

| IFNgamma (pg/ml)           | Experiment 1 | Experiment 2 | Experiment 3 | Experiment 4 | Experiment 5 |
|----------------------------|--------------|--------------|--------------|--------------|--------------|
| mock w/o peptide           | 13,51        | 4,73         | 3,69         | 5,85         | 2,67         |
| mock Adeno/A1 peptide      | 79,31        | 32,93        | 77,73        | 66,03        | 3,75         |
|                            |              |              |              |              |              |
| Adeno TCR w/o peptide      | 27,71        | 3,30         | 6,50         | 4,57         | 0,00         |
| Adeno TCR Adeno/A1 peptide | 10717,56     | 5861,46      | 732,28       | 8113,20      | 5798,47      |

Table S2B: raw data to Fig. 2B

| IL-2 (pg/ml)        | Exp. 1  | Exp. 2  | Exp. 3 | Exp. 4  | Exp. 5  | Exp. 6  | Exp. 7 |
|---------------------|---------|---------|--------|---------|---------|---------|--------|
| mock w/o virus      | 0,40    | 0,60    | 0,97   | 1,76    | 9,44    | 0,87    | 0,55   |
| mock w/ virus       | 109,31  | 3,40    | 0,91   | 109,89  | 196,53  | 31,75   | 10,56  |
|                     |         |         |        |         |         |         |        |
| Adeno TCR w/o virus | 2,35    | 1,24    | 5,00   | 2,01    | 8,79    | 0,77    | 0,33   |
| Adeno TCR w/ virus  | 2158,86 | 1100,94 | 469,21 | 1587,89 | 4994,01 | 1340,91 | 824,26 |

| TNF (pg/ml)         | Exp. 1 | Exp. 2 | Exp. 3 | Exp. 4 | Exp. 5  | Exp. 6 | Exp. 7 |
|---------------------|--------|--------|--------|--------|---------|--------|--------|
| mock w/o virus      | 2,54   | 15,29  | 2,55   | 4,33   | 11,37   | 5,45   | 10,28  |
| mock w/ virus       | 3,82   | 12,98  | 3,51   | 7,35   | 36,19   | 5,75   | 60,84  |
|                     |        |        |        |        |         |        |        |
| Adeno TCR w/o virus | 1,98   | 16,40  | 3,19   | 7,55   | 11,23   | 5,85   | 7,96   |
| Adeno TCR w/ virus  | 134,55 | 342,22 | 38,11  | 157,62 | 2968,48 | 854,08 | 969,22 |

| IFNgamma (pg/ml)    | Exp. 1  | Exp. 2  | Exp. 3  | Exp. 4  | Exp. 5  | Exp. 6  | Exp. 7  |
|---------------------|---------|---------|---------|---------|---------|---------|---------|
| mock w/o virus      | 2,83    | 2,67    | 11,60   | 5,85    | 13,51   | 4,73    | 3,69    |
| mock w/ virus       | 138,34  | 5,42    | 9,88    | 310,28  | 449,54  | 91,44   | 161,79  |
|                     |         |         |         |         |         |         |         |
| Adeno TCR w/o virus | 4,52    | 0,00    | 96,36   | 4,57    | 27,71   | 3,30    | 6,50    |
| Adeno TCR w/ virus  | 2927,94 | 1420,44 | 2354,34 | 7932,33 | 8951,21 | 4554,01 | 1575,21 |

Table S3A: raw data to Fig. 3A

IL-2 (pg/ml)

mock w/o pept  
 mock w/ Adeno pept  
 Adeno TCR w/o pept  
 Adeno TCR w/ Adeno pept  
 Adeno TCR+CD8a w/o pept.  
 Adeno TCR+CD8a w/ Adeno pept.

| Experiment 1 | Experiment 2 | Experiment 3 |
|--------------|--------------|--------------|
| 1,04         | 0,65         | 1,37         |
| 1,10         | 0,60         | 1,86         |
| 0,29         | 0,19         | 0,99         |
| 0,99         | 1,15         | 1,48         |
| 0,14         | 0,34         | 1,53         |
| 23,04        | 5,97         | 70,66        |

TNF (pg/ml)

mock w/o pept  
 mock w/ Adeno pept  
 Adeno TCR w/o pept  
 Adeno TCR w/ Adeno pept  
 Adeno TCR+CD8a w/o pept.  
 Adeno TCR+CD8a w/ Adeno pept.

| Experiment 1 | Experiment 2 | Experiment 3 |
|--------------|--------------|--------------|
| 10,42        | 4,03         | 13,74        |
| 3,77         | 3,35         | 14,78        |
| 8,95         | 3,46         | 17,38        |
| 35,39        | 3,87         | 156,97       |
| 6,65         | 0,00         | 12,04        |
| 435,11       | 26,86        | 1926,08      |

IFNgamma (pg/ml)

mock w/o pept  
 mock w/ Adeno pept  
 Adeno TCR w/o pept  
 Adeno TCR w/ Adeno pept  
 Adeno TCR+CD8a w/o pept.  
 Adeno TCR+CD8a w/ Adeno pept.

| Experiment 1 | Experiment 2 | Experiment 3 |
|--------------|--------------|--------------|
| 12,58        | 50,40        | 2222,25      |
| 12,58        | 53,36        | 2818,75      |
| 13,69        | 119,46       | 2263,28      |
| 1183,99      | 677,74       | 6621,23      |
| 19,10        | 167,49       | 1849,38      |
| 10768,81     | 3205,58      | 20284,65     |

Table S3B : raw data to Fig. 3B

IL-2 (pg/ml)

mock w/o pept  
 mock w/ Adeno pept  
 Adeno TCR w/o pept  
 Adeno TCR w/ Adeno pept  
 Adeno TCR+CD8a w/o pept.  
 Adeno TCR+CD8a w/ Adeno pept.

| Experiment 1 | Experiment 2 | Experiment 3 |
|--------------|--------------|--------------|
| 1,57         | 0,34         | 0,04         |
| 0,55         | 0,29         | 0,18         |
| 1,10         | 0,19         | 0,38         |
| 2,96         | 101,62       | 30,85        |
| 1,31         | 0,00         | 0,04         |
| 21,91        | 559,27       | 199,34       |

TNF (pg/ml)

mock w/o pept  
 mock w/ Adeno pept  
 Adeno TCR w/o pept  
 Adeno TCR w/ Adeno pept  
 Adeno TCR+CD8a w/o pept.  
 Adeno TCR+CD8a w/ Adeno pept.

| Experiment 1 | Experiment 2 | Experiment 3 |
|--------------|--------------|--------------|
| 1,41         | 1,33         | 5,21         |
| 1,52         | 1,69         | 3,19         |
| 0,73         | 1,48         | 6,90         |
| 27,07        | 3486,66      | 1052,82      |
| 1,99         | 4,09         | 5,21         |
| 170,85       | 4959,13      | 1533,30      |

IFNgamma (pg/ml)

mock w/o pept  
 mock w/ Adeno pept  
 Adeno TCR w/o pept  
 Adeno TCR w/ Adeno pept  
 Adeno TCR+CD8a w/o pept.  
 Adeno TCR+CD8a w/ Adeno pept.

| Experiment 1 | Experiment 2 | Experiment 3 |
|--------------|--------------|--------------|
| 5,25         | 6,16         | 85,21        |
| 3,70         | 0,22         | 89,84        |
| 3,70         | 49,58        | 207,92       |
| 1120,19      | 16442,33     | 16191,35     |
| 3,40         | 21,17        | 153,99       |
| 5324,20      | 19691,21     | 19922,25     |

Table S4: raw data to Fig. 4

| CD8 T + MAGE1 TCR | Donor 1 | Donor 2 | Donor 3 | Donor 4 |
|-------------------|---------|---------|---------|---------|
| gamma/delta FITC  | 8,12    | 2,65    | 4,37    | 3,29    |
| CD4 FITC          | 1,22    | 0,7     | 0,79    | 1,06    |
| CD8 FITC          | 95,71   | 93,06   | 81,64   | 92,44   |
| CD16 FITC         | -0,01   | -0,02   | 0,17    | 1,72    |
| CD19 FITC         | 0,05    | 0,13    | 0,07    | 0,07    |
| CD14 FITC         | 2,85    | 1,2     | 2,95    | 2,07    |
| Streptamer-PE     | 1,65    | 1,25    | 0,68    | 3,02    |

| CD8 T + Adeno TCR | Donor 1 | Donor 2 | Donor 3 | Donor 4 |
|-------------------|---------|---------|---------|---------|
| gamma/delta FITC  | 7,56    | 2,74    | 4,06    | 3,45    |
| CD4 FITC          | 1,24    | 0,78    | 0,54    | 1,37    |
| CD8 FITC          | 96,4    | 77,88   | 81,71   | 93,58   |
| CD16 FITC         | 0,2     | 0,08    | 0,19    | 0,9     |
| CD19 FITC         | -0,09   | -0,19   | 0,01    | -0,11   |
| CD14 FITC         | 2,98    | 1,35    | 2,62    | 1,81    |
| Streptamer-PE     | 46,68   | 15,43   | 6,34    | 18,27   |

| g/d T + MAGE1 TCR | Donor 1 | Donor 2 | Donor 3 | Donor 4 |
|-------------------|---------|---------|---------|---------|
| gamma/delta FITC  | 96,34   | 96,35   | 85,56   | 94,44   |
| CD4 FITC          | 2,2     | 1,08    | 0,22    | 0,63    |
| CD8 FITC          | 71,13   | 39,3    | 33,37   | 48,33   |
| CD16 FITC         | 0,63    | 0,94    | 1,99    | 24,88   |
| CD19 FITC         | -0,16   | 0,38    | -0,05   | 0,1     |
| CD14 FITC         | 5,82    | 0,52    | 4,9     | 3,59    |
| Streptamer-PE     | 3,36    | 1,54    | 1,44    | 2,22    |

| g/d T + Adeno TCR | Donor 1 | Donor 2 | Donor 3 | Donor 4 |
|-------------------|---------|---------|---------|---------|
| gamma/delta FITC  | 96,11   | 93,57   | 80,65   | 94,27   |
| CD4 FITC          | 2,11    | 0,82    | 0,2     | 0,52    |
| CD8 FITC          | 77,25   | 49,48   | 43,79   | 55,04   |
| CD16 FITC         | 0,5     | 0,47    | 1,82    | 22,6    |
| CD19 FITC         | -0,07   | 0,01    | -0,03   | 0,06    |
| CD14 FITC         | 4,73    | 3,57    | 5,79    | 2,76    |
| Streptamer-PE     | 47,46   | 15,38   | 17,59   | 16,18   |

Table S5A : raw data to Fig. 5A

IL-2 (pg/ml)

|                                | Experiment 1 | Experiment 2 | Experiment 3 |
|--------------------------------|--------------|--------------|--------------|
| CD8 T +mock control            | 2,66         | 1,34         | 2,53         |
| CD8 T +mock w/ Adeno pept      | 2,41         | 3,62         | 2,53         |
| CD8 T +Adeno TCR control       | 2,03         | 1,58         | 6,03         |
| CD8 T +Adeno TCR w/ Adeno pept | 124,61       | 252,85       | 114,56       |
| g/d +Adeno TCR+CD8a control    | 0,22         | 0,00         | 0,54         |
| g/d +Adeno TCR+CD8a Adeno pept | 13,36        | 559,27       | 134,88       |

TNF (pg/ml)

|                                | Experiment 1 | Experiment 2 | Experiment 3 |
|--------------------------------|--------------|--------------|--------------|
| CD8 T +mock control            | 1,13         | 3,27         | 3,71         |
| CD8 T +mock w/ Adeno pept      | 2,96         | 2,56         | 1,57         |
| CD8 T +Adeno TCR control       | 0,00         | 3,12         | 9,95         |
| CD8 T +Adeno TCR w/ Adeno pept | 227,26       | 1013,54      | 26,38        |
| g/d +Adeno TCR+CD8a control    | 5,54         | 4,09         | 3,34         |
| g/d +Adeno TCR+CD8a Adeno pept | 623,42       | 4959,13      | 120,11       |

IFNgamma (pg/ml)

|                                | Experiment 1 | Experiment 2 | Experiment 3 |
|--------------------------------|--------------|--------------|--------------|
| CD8 T +mock control            | 30,85        | 31,65        | 47,26        |
| CD8 T +mock w/ Adeno pept      | 41,44        | 62,76        | 54,41        |
| CD8 T +Adeno TCR control       | 28,33        | 51,20        | 238,30       |
| CD8 T +Adeno TCR w/ Adeno pept | 10967,19     | 15859,80     | 2945,61      |
| g/d +Adeno TCR+CD8a control    | 220,03       | 21,17        | 43,69        |
| g/d +Adeno TCR+CD8a Adeno pept | 16911,49     | 19691,21     | 5590,96      |

Table S5B: raw data to Fig. 5B

IL-2 (pg/ml)

|                                | Experiment 1 | Experiment 2 | Experiment 3 |
|--------------------------------|--------------|--------------|--------------|
| CD8 T +mock control            | 9,73         | 8,20         | 4,67         |
| CD8 T +mock w/ Adeno pept      | 13,77        | 8,96         | 4,94         |
| CD8 T +Adeno TCR control       | 5,84         | 5,78         | 5,55         |
| CD8 T +Adeno TCR w/ Adeno pept | 283,20       | 425,75       | 198,02       |
| g/d +Adeno TCR+CD8a control    | 0,39         | 0,42         | 1,46         |
| g/d +Adeno TCR+CD8a Adeno pept | 5,94         | 730,83       | 113,49       |

TNF (pg/ml)

|                                | Experiment 1 | Experiment 2 | Experiment 3 |
|--------------------------------|--------------|--------------|--------------|
| CD8 T +mock control            | 159,52       | 172,41       | 14,23        |
| CD8 T +mock w/ Adeno pept      | 171,04       | 176,75       | 15,99        |
| CD8 T +Adeno TCR control       | 108,28       | 162,44       | 45,39        |
| CD8 T +Adeno TCR w/ Adeno pept | 1868,57      | 3214,14      | 144,29       |
| g/d +Adeno TCR+CD8a control    | 220,78       | 146,95       | 61,25        |
| g/d +Adeno TCR+CD8a Adeno pept | 2759,23      | 7050,26      | 467,43       |

IFNgamma (pg/ml)

|                                | Experiment 1 | Experiment 2 | Experiment 3 |
|--------------------------------|--------------|--------------|--------------|
| CD8 T +mock control            | 7921,90      | 3884,45      | 501,22       |
| CD8 T +mock w/ Adeno pept      | 7402,41      | 4553,82      | 357,97       |
| CD8 T +Adeno TCR control       | 4336,73      | 2810,99      | 825,17       |
| CD8 T +Adeno TCR w/ Adeno pept | 24582,78     | 25803,59     | 9113,38      |
| g/d +Adeno TCR+CD8a control    | 3212,10      | 515,34       | 1063,76      |
| g/d +Adeno TCR+CD8a Adeno pept | 23927,20     | 24335,88     | 8401,40      |



Table S6: raw data to Fig. 6

|                   |          |          |       | Donor 1 | Donor 2 | Donor 3 | Donor 4 |
|-------------------|----------|----------|-------|---------|---------|---------|---------|
| CD8 T M1/A1 TCR   | w/o pept | II-2     | 1,28  | 0,46    | 0,47    | 0,18    |         |
|                   |          | TNF      | 0,67  | 0,24    | 0,44    | 0,49    |         |
|                   |          | IFNgamma | 1,83  | 0,58    | 0,78    | 1,8     |         |
|                   | w/ pept  | II-2     | 1,92  | 0,66    | 0,52    | 0,13    |         |
|                   |          | TNF      | 0,71  | 0,48    | 0,86    | 0,51    |         |
|                   |          | IFNgamma | 2,04  | 1,35    | 1,23    | 1,45    |         |
| CD8 T HAdV/A1 TCR | w/o pept | II-2     | 1,07  | 1,05    | 0,87    | 0,09    |         |
|                   |          | TNF      | 0,71  | 0,58    | 0,93    | 0,27    |         |
|                   |          | IFNgamma | 2,58  | 2,24    | 1,52    | 0,97    |         |
|                   | w/ pept  | II-2     | 5,37  | 4,64    | 2,71    | 1,97    |         |
|                   |          | TNF      | 22,81 | 12,78   | 11,91   | 7,67    |         |
|                   |          | IFNgamma | 47,96 | 39,99   | 29,71   | 20,48   |         |
| g/d T M1/A1 TCR   | w/o pept | II-2     |       | 0,44    | 0,93    | 0,34    |         |
|                   |          | TNF      |       | 3,19    | 2,1     | 2,39    |         |
|                   |          | IFNgamma |       | 7,25    | 2,62    | 10,32   |         |
|                   | w/ pept  | II-2     |       | 0,39    | 0,54    | 0,28    |         |
|                   |          | TNF      |       | 3,32    | 2,26    | 4,13    |         |
|                   |          | IFNgamma |       | 7,44    | 2,9     | 16,24   |         |
| g/d T HAdV/A1 TCR | w/o pept | II-2     |       | 0,36    | 0,28    | 0,17    |         |
|                   |          | TNF      |       | 3,7     | 1,92    | 1,57    |         |
|                   |          | IFNgamma |       | 8,14    | 2,48    | 6,62    |         |
|                   | w/ pept  | II-2     |       | 2,07    | 2,01    | 1,21    |         |
|                   |          | TNF      |       | 28,14   | 25,96   | 9,5     |         |
|                   |          | IFNgamma |       | 50,08   | 33,05   | 26,52   |         |

Table S7A : raw data to Fig. 7A

Autologous system

|                                 |      | Exp. 1  | Exp. 2 | Exp.3  | Exp. 4 | Exp. 5 | Exp. 6 |
|---------------------------------|------|---------|--------|--------|--------|--------|--------|
| CD8 M1/A1 TCR mDC empty         | 1:60 | -7,863  | 3,988  | 1,28   | 1,047  | 6,386  | 7,601  |
|                                 | 1:20 | -4,983  | -0,443 | 1,38   | 1,222  | 3,08   | 8,076  |
|                                 | 1:6  | -7,863  | 0,148  | 0,492  | 1,396  | 5,034  | 8,789  |
|                                 | 1:2  | -4,097  | 6,352  | 1,28   | -0,524 | 1,127  | 3,325  |
| CD8 HAdV/A1 TCR mDC empty       | 1:60 | -6,977  | 2,511  | 2,86   | 1,919  | 3,681  | 9,739  |
|                                 | 1:20 | -11,406 | -0,443 | 0,295  | 1,571  | 3,381  | 7,601  |
|                                 | 1:6  | -4,7619 | 1,625  | 0,394  | -1,745 | 1,578  | 5,463  |
|                                 | 1:2  | -7,198  | 1,329  | 1,28   | -0,175 | 2,179  | 3,8    |
| CD8 M1/A1 TCR mDC+Adeno pept.   | 1:60 | 1,825   | 0,875  | -0,139 | -5,81  | 2,013  | 9,71   |
|                                 | 1:20 | -2,255  | 1,313  | -4,596 | 3,267  | 4,866  | 10,68  |
|                                 | 1:6  | -2,47   | 1,969  | 0,696  | 6,897  | 1,342  | 13,59  |
|                                 | 1:2  | 2,256   | 2,188  | -6,267 | 11,978 | 0,671  | 4,531  |
| CD8 HAdV/A1 TCR mDC+Adeno pept. | 1:60 | 48,66   | 32,604 | 33,008 | 38,476 | 49,66  | 53,074 |
|                                 | 1:20 | 45,65   | 30,853 | 25,766 | 46,824 | 41,275 | 49,51  |
|                                 | 1:6  | 37,91   | 15,755 | 18,245 | 27,586 | 27,685 | 29,45  |
|                                 | 1:2  | 10,2    | 7,44   | 5,432  | 15,608 | 13,758 | 16,83  |
| CD8 M1/A1 TCR mDC+adenovirus    | 1:60 | 6,94    | -3,741 | 10,311 | 3,321  | 4,88   | 9,615  |
|                                 | 1:20 | 5,01    | 1,701  | 8,551  | 6,088  | 5,919  | 11,859 |
|                                 | 1:6  | 2,47    | 0,34   | 2,782  | 6,088  | 6,957  | 15,385 |
|                                 | 1:2  | 0,69    | 1,701  | 1,637  | 3,506  | 2,596  | 8,974  |
| CD8 HAdV/A1 TCR mDC+adenovirus  | 1:60 | 35,16   | 24,83  | 25,2   | 19,926 | 25,65  | 46,47  |
|                                 | 1:20 | 29,76   | 16,67  | 21,11  | 17,712 | 24,195 | 28,53  |
|                                 | 1:6  | 14,88   | 12,585 | 10,966 | 9,963  | 14,226 | 28,21  |
|                                 | 1:2  | 6,09    | 13,946 | 7,201  | 4,613  | 11,111 | 21,795 |

Table S7B: raw data to Fig. 7B

Autologous system

|                         |      | Exp. 1  | Exp. 2 | Exp. 3 | Exp. 4 | Exp. 5 | Exp. 6 |
|-------------------------|------|---------|--------|--------|--------|--------|--------|
| g/d M1/A1 TCR mDC empty | 1:60 | -10,963 | 3,98   | 0,98   | -0,17  | 3,83   | 8,79   |
|                         | 1:20 | -4,54   | 0,443  | -1,77  | -1,396 | 2,93   | -0,71  |
|                         | 1:6  | -6,98   | 2,81   | 0,79   | 1,22   | 0,53   | 0,95   |
|                         | 1:2  | -3,211  | 4,579  | -0,89  | -2,44  | -0,83  | -1,66  |

|                           |      |        |        |       |        |       |       |
|---------------------------|------|--------|--------|-------|--------|-------|-------|
| g/d HAdV/A1 TCR mDC empty | 1:60 | -5,65  | 0,148  | -0,1  | -1,92  | 4,88  | 5,46  |
|                           | 1:20 | -10,08 | -0,738 | 0,689 | -1,396 | 2,48  | 2,61  |
|                           | 1:6  | -5,87  | 0,148  | 0,1   | -1,396 | 0,83  | -0,95 |
|                           | 1:2  | -6,53  | -0,148 | 0,1   | 0,17   | 0,225 | -1,19 |

|                               |      |        |      |        |       |       |       |
|-------------------------------|------|--------|------|--------|-------|-------|-------|
| g/d M1/A1 TCR mDC+Adeno pept. | 1:60 | -3,11  | 2,63 | -10,17 | -1,09 | 3,86  | 1,618 |
|                               | 1:20 | -3,97  | 1,97 | -0,42  | 1,81  | 2,01  | -2,96 |
|                               | 1:6  | -3,323 | 0,66 | -11    | 1,09  | 0,839 | 1,29  |
|                               | 1:2  | -3,33  | 2,63 | -5,99  | 4,36  | 0,168 | 4,21  |

|                                 |      |       |        |       |       |       |       |
|---------------------------------|------|-------|--------|-------|-------|-------|-------|
| g/d HAdV/A1 TCR mDC+Adeno pept. | 1:60 | 59,61 | 43,107 | 48,33 | 30,85 | 49,33 | 62,78 |
|                                 | 1:20 | 57,25 | 32,17  | 34,96 | 56,99 | 39,77 | 66,02 |
|                                 | 1:6  | 52,74 | 19,69  | 26,6  | 38,48 | 26,01 | 56,31 |
|                                 | 1:2  | 31,04 | 14,44  | 15,18 | 18,15 | 13,26 | 25,89 |

|                              |      |       |      |       |       |      |       |
|------------------------------|------|-------|------|-------|-------|------|-------|
| g/d M1/A1 TCR mDC+adenovirus | 1:60 | 3,55  | 5,78 | 2,455 | 2,77  | 6,33 | -3,53 |
|                              | 1:20 | 2,62  | 3,06 | 3,76  | 1,11  | 4,04 | 0,96  |
|                              | 1:6  | -0,31 | -1,7 | 2,78  | 1,85  | 1,77 | 1,92  |
|                              | 1:2  | 0,54  | 1,02 | 0,98  | -0,55 | 1,14 | 1,28  |

|                                |      |       |       |       |       |       |       |
|--------------------------------|------|-------|-------|-------|-------|-------|-------|
| g/d HAdV/A1 TCR mDC+adenovirus | 1:60 | 29,22 | 24,83 | 24,06 | 20,48 | 24,61 | 41,35 |
|                                | 1:20 | 26,75 | 25,51 | 17,51 | 16,61 | 17,34 | 36,86 |
|                                | 1:6  | 15,57 | 22,19 | 12,77 | 10,7  | 15,05 | 29,81 |
|                                | 1:2  | 9,33  | 4,42  | 10,47 | 7,75  | 13,4  | 15,71 |

Table S7C: raw data to Fig. 7C

Allogeneic system

|                                 |      | Exp. 1 | Exp. 2 | Exp. 3 | Exp. 4 |
|---------------------------------|------|--------|--------|--------|--------|
| CD8 M1/A1 TCR mDC empty         | 1:60 | 4,363  | 2,74   | 17,11  | 3,46   |
|                                 | 1:20 | 1,745  | 5,18   | 13,46  | 0,07   |
|                                 | 1:6  | 0,873  | 1,57   | 9,26   | 2,28   |
|                                 | 1:2  | -0,698 | 1,46   | 3,93   | 0,96   |
| CD8 HAdV/A1 TCR mDC empty       | 1:60 | 2,967  | 7,63   | 21,879 | 1,69   |
|                                 | 1:20 | 1,396  | 2,85   | 13,18  | 0,96   |
|                                 | 1:6  | -0,175 | 1,1    | 11,22  | 0,96   |
|                                 | 1:2  | 1,047  | -0,99  | 6,17   | 1,98   |
| CD8 M1/A1 TCR mDC+Adeno pept.   | 1:60 | 8,59   | 4,46   | 14,01  | 2,17   |
|                                 | 1:20 | 5,02   | 6,44   | 13,45  | 0,5    |
|                                 | 1:6  | 6,32   | 7,68   | 9,24   | 5,17   |
|                                 | 1:2  | -1,78  | 0,74   | 4,48   | 2,67   |
| CD8 HAdV/A1 TCR mDC+Adeno pept. | 1:60 | 47,49  | 37,67  | 31,37  | 45,37  |
|                                 | 1:20 | 46,52  | 40,4   | 25,49  | 43,87  |
|                                 | 1:6  | 38,41  | 19,08  | 24,65  | 29,69  |
|                                 | 1:2  | 9,89   | 9,17   | 8,4    | 13,34  |
| CD8 M1/A1 TCR mDC+adenovirus    | 1:60 | 6,76   | 7,38   | 13,08  | 9,87   |
|                                 | 1:20 | 2,02   | 6,24   | 12,05  | 16,45  |
|                                 | 1:6  | 2,54   | 6,52   | 10,77  | 17,11  |
|                                 | 1:2  | -1,01  | 3,26   | 6,67   | 19,08  |
| CD8 HAdV/A1 TCR mDC+adenovirus  | 1:60 | 25,53  | 25,67  | 32,82  | 30,92  |
|                                 | 1:20 | 16,74  | 18,44  | 28,72  | 26,97  |
|                                 | 1:6  | 13,69  | 16,03  | 19,74  | 25,66  |
|                                 | 1:2  | 6,26   | 12,34  | 9,23   | 10,53  |

Table S7D: raw data to Fig. 7D

Allogeneic system

|                         | Exp. 1 | Exp. 2 | Exp. 3 | Exp. 4 |
|-------------------------|--------|--------|--------|--------|
| g/d M1/A1 TCR mDC empty |        |        |        |        |
| 1:60                    | -0,52  | 2,5    | 9,54   | 0,52   |
| 1:20                    | -0,17  | 1,456  | 1,4    | -0,96  |
| 1:6                     | -0,17  | 1,57   | 1,4    | -1,25  |
| 1:2                     | -0,52  | 0,757  | 0,28   | -0,66  |

|                           |       |      |       |       |
|---------------------------|-------|------|-------|-------|
| g/d HAdV/A1 TCR mDC empty |       |      |       |       |
| 1:60                      | -0,7  | 2,15 | 14,02 | 0,515 |
| 1:20                      | 1,05  | 1,22 | 5,05  | -0,37 |
| 1:6                       | -1,57 | 1,57 | 0,56  | 0,07  |
| 1:2                       | -1,22 | 0,52 | 0,84  | 1,1   |

|                               |      |       |      |       |
|-------------------------------|------|-------|------|-------|
| g/d M1/A1 TCR mDC+Adeno pept. |      |       |      |       |
| 1:60                          | 1,78 | 1,49  | 2,8  | -0,17 |
| 1:20                          | 3,73 | 1,73  | 7    | -1,33 |
| 1:6                           | 7,29 | -2,23 | 3,08 | -2,67 |
| 1:2                           | 1,13 | -7,19 | 0    | 0,83  |

|                                 |       |       |       |       |
|---------------------------------|-------|-------|-------|-------|
| g/d HAdV/A1 TCR mDC+Adeno pept. |       |       |       |       |
| 1:60                            | 61,1  | 38,17 | 38,38 | 56,71 |
| 1:20                            | 66,29 | 45,85 | 30,53 | 45,54 |
| 1:6                             | 55,59 | 24,78 | 25,49 | 45,54 |
| 1:2                             | 21,88 | 16,6  | 7,28  | 36,2  |

|                              |       |       |       |      |
|------------------------------|-------|-------|-------|------|
| g/d M1/A1 TCR mDC+adenovirus |       |       |       |      |
| 1:60                         | -2,03 | 4,96  | 5,13  | 12,5 |
| 1:20                         | -2,2  | 3,69  | 5,9   | 8,55 |
| 1:6                          | -1,69 | 2,411 | -1,28 | 5,92 |
| 1:2                          | -0,85 | 2,12  | 0     | 0,66 |

|                                |       |        |       |       |
|--------------------------------|-------|--------|-------|-------|
| g/d HAdV/A1 TCR mDC+adenovirus |       |        |       |       |
| 1:60                           | 19,95 | 22,13  | 30,26 | 50,66 |
| 1:20                           | 19,44 | 18,01  | 20,77 | 45,39 |
| 1:6                            | 14,71 | 12,199 | 19,49 | 38,82 |
| 1:2                            | 7,27  | 8,79   | 7,69  | -1,31 |
